# Supplementary material for: Norbornene derived nanocarrier reduces isoniazid mediated liver toxicity: assessment in HepG2 cell line and zebrafish model
Source: Royal Society of Chemistry journal article supplement (doi:10.1039/c6ra23557c), 2016-01-01
Supplement: c6ra23557c1.pdf [file c6ra23557c1.pdf]

SUPPORTING INFORMATION

Figures

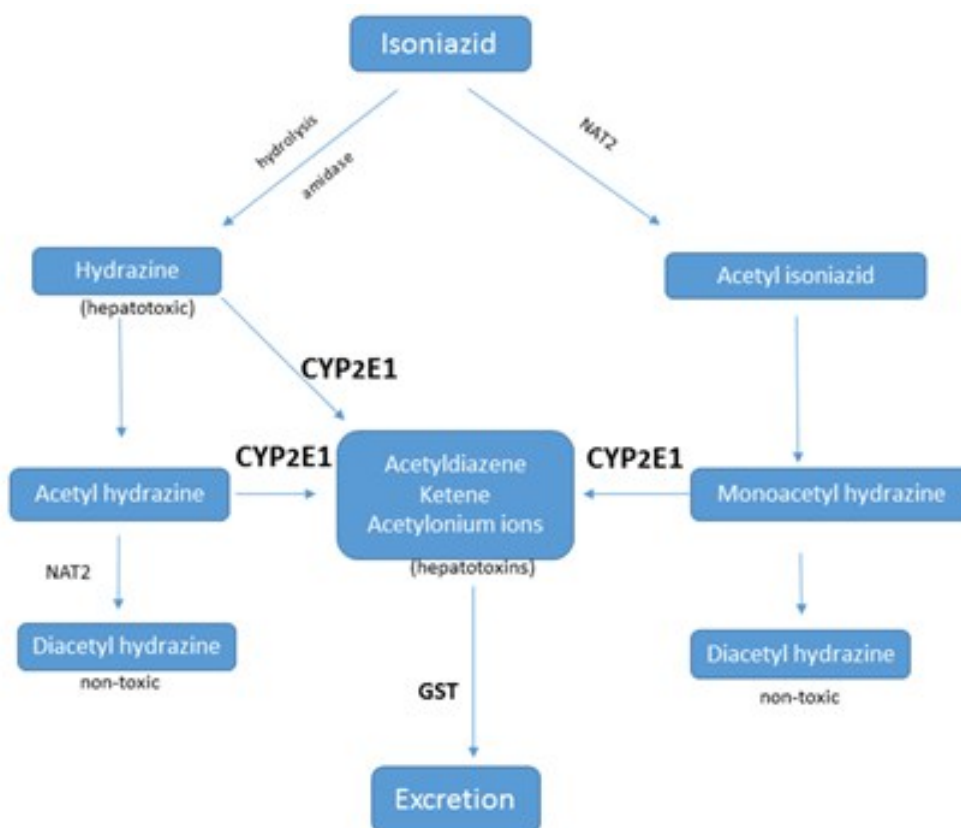

Figure : Suggested involvement of CYP2E1 in INH metabolism(23,24)  
Glutathione S transferase (GST), N-acetyl transferase 2(NAT2)

Figure S1. Suggested involvement of CYP2E1 in INH metabolism (23,24)

**Figure S2: Cytotoxic effect of INH and INH-CP in HepG2 cells.**

Morphological assessment of HepG2 cells exposed to different concentrations of INH and INH-CP for 48 hours. (magnification X200)

**Isoniazid treated HepG2 cells**

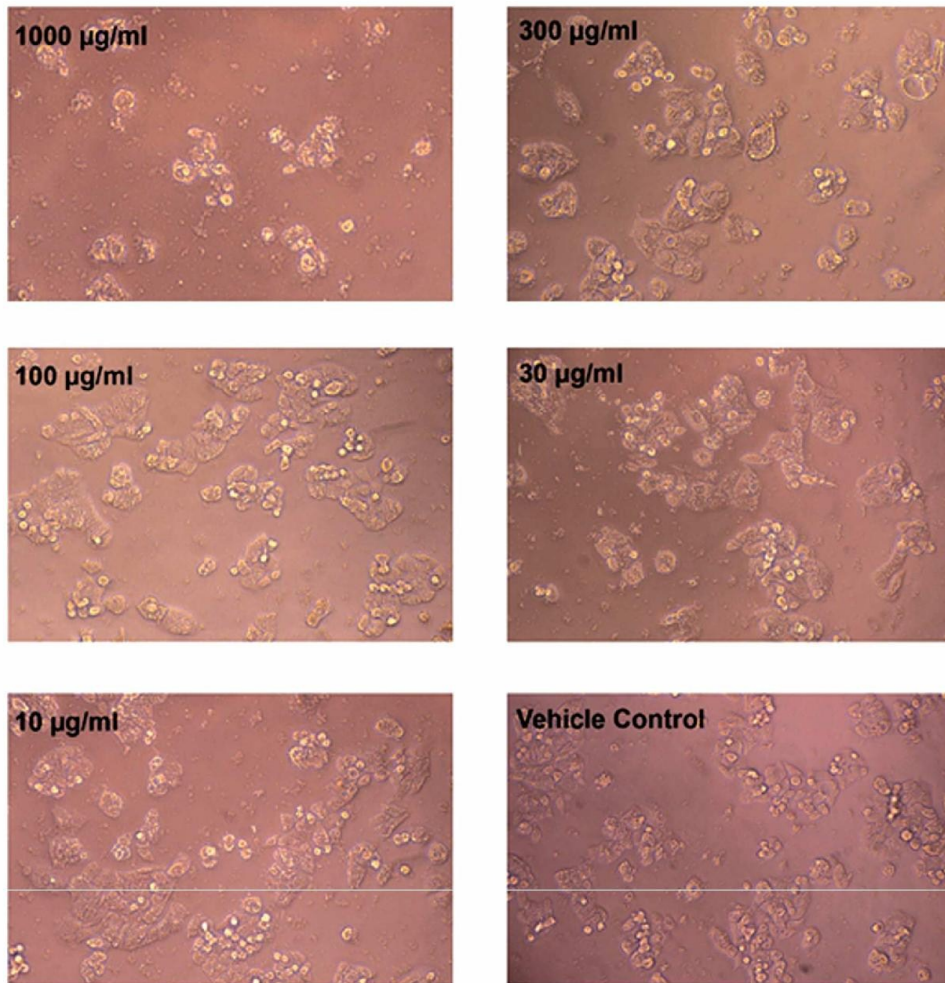

**INH-CP treated HepG2 cells**

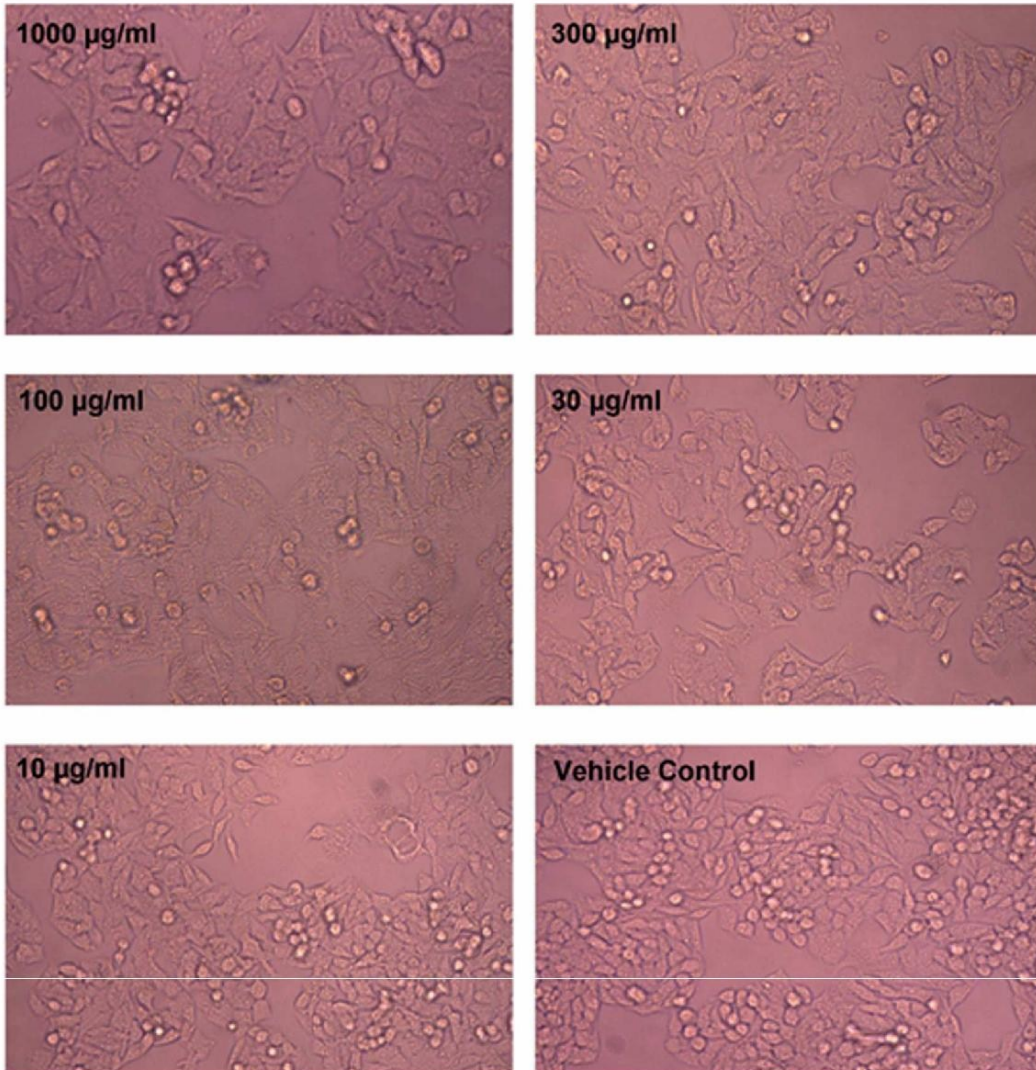

## Tables

**Table ST1: Minimum Inhibitory concentrations (MICs) ( $\mu\text{g/ml}$ ) of INH, INH-CP and norbornene against H37Rv strain determined by absolute concentration method.**

| Drug       | MIC in ( $\mu\text{g/ml}$ ) |
|------------|-----------------------------|
| Norbornene | 25                          |
| Isoniazid  | 0.025                       |
| INH-CP     | 1                           |

**Table ST2: Effect of isoniazid and isoniazid complexed nanocarrier system on behavioral activity of *Danio rerio***

| Nature of behavior      | Treatment concentration |        |        |        |         |         |
|-------------------------|-------------------------|--------|--------|--------|---------|---------|
|                         | INH                     |        |        |        |         | INH-CP  |
|                         | Control                 | 120Hr  | 96Hr   | 72 Hr  | 48Hr    | 7 days  |
|                         | (96 hr)                 | 25mg/L | 50mg/L | 75mg/L | 100mg/L | 150mg/L |
| Loss of equilibrium     | -                       | +++    | +++    | +++    | +++     | -       |
| Hyper excitability      | -                       | +++    | +++    | +++    | +++     | -       |
| Body pigmentation       | -                       | -      | -      | -      | -       | -       |
| Mucus secretion         | -                       | +      | +      | +      | +       | -       |
| Fast opercular movement | -                       | +      | +      | +      | +       | -       |
| Mortality               | -                       | +++    | +++    | +++    | +++     | -       |

–: None (or) Normal; +: Mild effect; ++: Moderate effect; +++: High effect
